# Supplementary material
Source: Research Square preprint supplement (doi:10.21203/rs.3.rs-9390771/v1)
Supplement: Supplementary file 1 [file e970fb5eed485c455d515ed1.pdf]

# **Evaluating ibrutinib, pirtobrutinib, remibrutinib, rilzabrutinib, and zanubrutinib in 34 BTK-variants at 7 inhibitor resistance sites**

Abdulahman Hamasy, Qing Wang, Brisejda Rustemi, Eleni Afentaki, Alex Villa, Md Enamul Haque, Anna Berglöf, Mauno Vihinen, C.I. Edvard Smith, Rula Zain

**Supplementary table 1.** The BTK codons and the corresponding nucleotide alterations in the respective plasmids

|       |           |       |           |
|-------|-----------|-------|-----------|
| V416A | GTG > GCG | E513G | GAG > GGG |
| V416E | GTG > GAG | E513A | GAG > GCG |
| V416G | GTG > GGG | L528F | TTG > TTC |
| V416L | GTG > CTG | L528M | TTG > ATG |
| V416M | GTG > ATG | L528S | TTG > TCG |
| A428D | GCC > GAC | L528V | TTG > GTG |
| A428G | GCC > GGC | L528W | TTG > TGG |
| A428P | GCC > CCC | T316A | ACA > GCA |
| A428S | GCC > TCC | T316I | ACA > ATA |
| A428T | GCC > ACC | T316K | ACA > AAA |
| A428V | GCC > GTC | T316P | ACA > CCA |
| M437I | ATG > ATC | T316R | ACA > AGA |
| M437K | ATG > AAG | T316S | ACA > TCA |
| M437R | ATG > AGG |       |           |
| M437T | ATG > ACG |       |           |
| M437V | ATG > GTG |       |           |
| M477I | ATG > ATC |       |           |
| M477K | ATG > AAG |       |           |
| M477R | ATG > AGG |       |           |
| M477T | ATG > ACG |       |           |
| M477V | ATG > GTG |       |           |

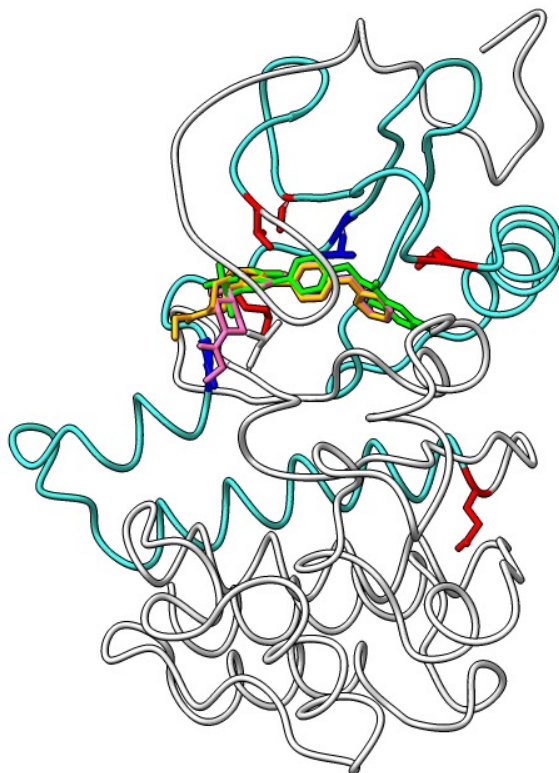

### Supplementary Figure S1.

Three-dimensional structure of the BTK kinase domain including ibrutinib (PDB ID 5p9i) (Bender *et al.* 2017). The region containing the investigated amino acids (416-528) is indicated with a cyan ribbon. The structure was superimposed with complexes for zanubrutinib (6j6m) (Guo *et al.* 2019) and pirtobrutinib (8fl1) (Gomez *et al.* 2023). Ibrutinib is in yellow, zanubrutinib in pink, and pirtobrutinib in green. The investigated residues are in red, and residues 474 and 481, studied earlier, are indicated in blue.

### References

Bender AT, Gardberg A, Pereira A, Johnson T, Wu Y, Grenningloh R *et al.* Ability of Bruton's Tyrosine Kinase Inhibitors to Sequester Y551 and Prevent Phosphorylation Determines Potency for Inhibition of Fc Receptor but not B-Cell Receptor Signaling. *Mol Pharmacol.* 2017;91:208-219.

Gomez EB, Ebata K, Randeria HS, Rosendahl MS, Cedervall EP, Morales TH *et al.* Preclinical characterization of pirtobrutinib, a highly selective, noncovalent (reversible) BTK inhibitor. *Blood.* 2023;142:62-72.

Guo Y, Liu Y, Hu N, Yu D, Zhou C, Shi G *et al.* Discovery of Zanubrutinib (BGB-3111), a Novel, Potent, and Selective Covalent Inhibitor of Bruton's Tyrosine Kinase. *J Med Chem.* 2019; 62:7923-7940.
